# Supplementary material for: Adaptation of transgene mRNA translation boosts the anticancer efficacy of oncolytic HSV1
Source: HighWire-hosted journal article supplement (doi:10.1136/jitc-2022-006408), 2023-03-01
Supplement: jitc-2022-006408supp001_data_supplement.pdf [file jitc-2022-006408supp001_data_supplement.pdf]

## Supplementary Figure 1.

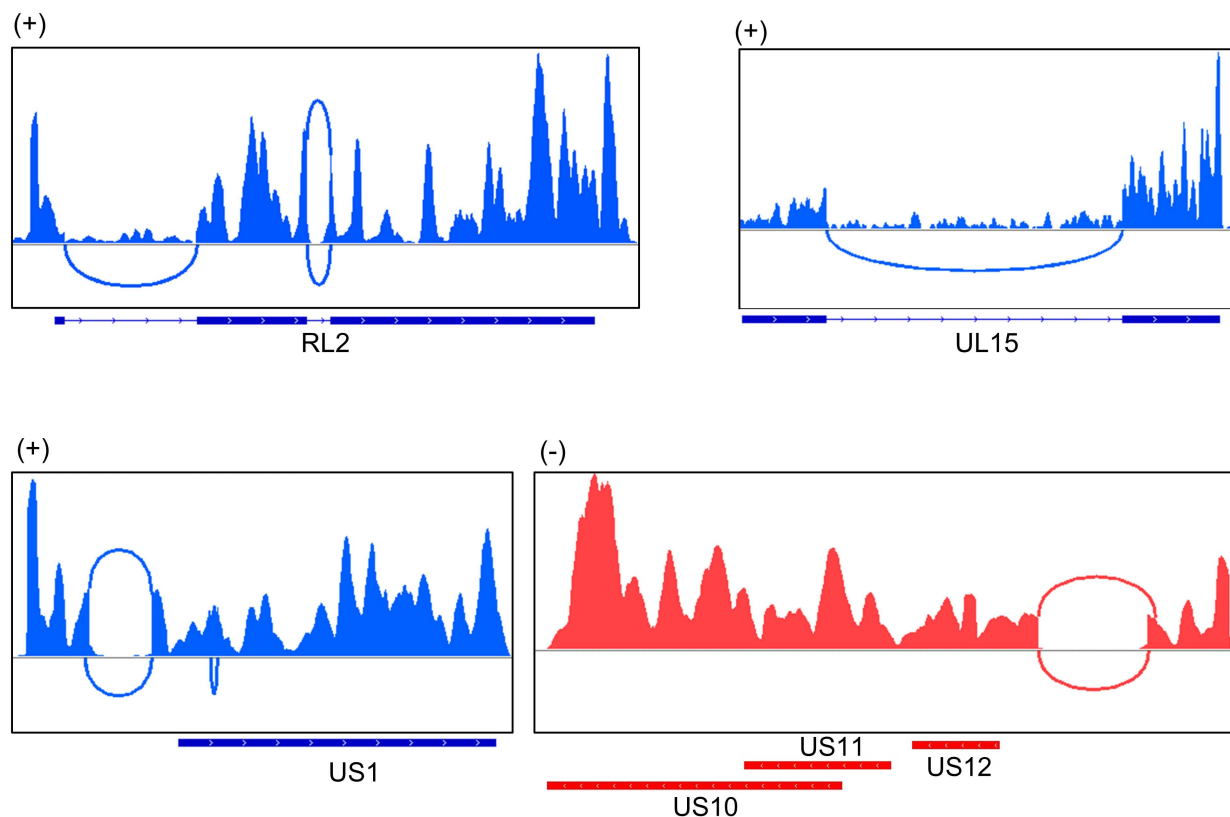

**Supplementary Figure 1.** Examples of spliced junction detected on known HSV1 spliced transcripts. Individual transcripts (RL2, UL15, US1, US12) identified by RNA-seq coverage on the positive strand (blue) and negative strand (red).
