# Supplementary material for: Adaptation of transgene mRNA translation boosts the anticancer efficacy of oncolytic HSV1
Source: HighWire-hosted journal article supplement (doi:10.1136/jitc-2022-006408), 2023-03-01
Supplement: jitc-2022-006408supp007_data_supplement.pdf [file jitc-2022-006408supp007_data_supplement.pdf]

## Supplementary Figure 7.

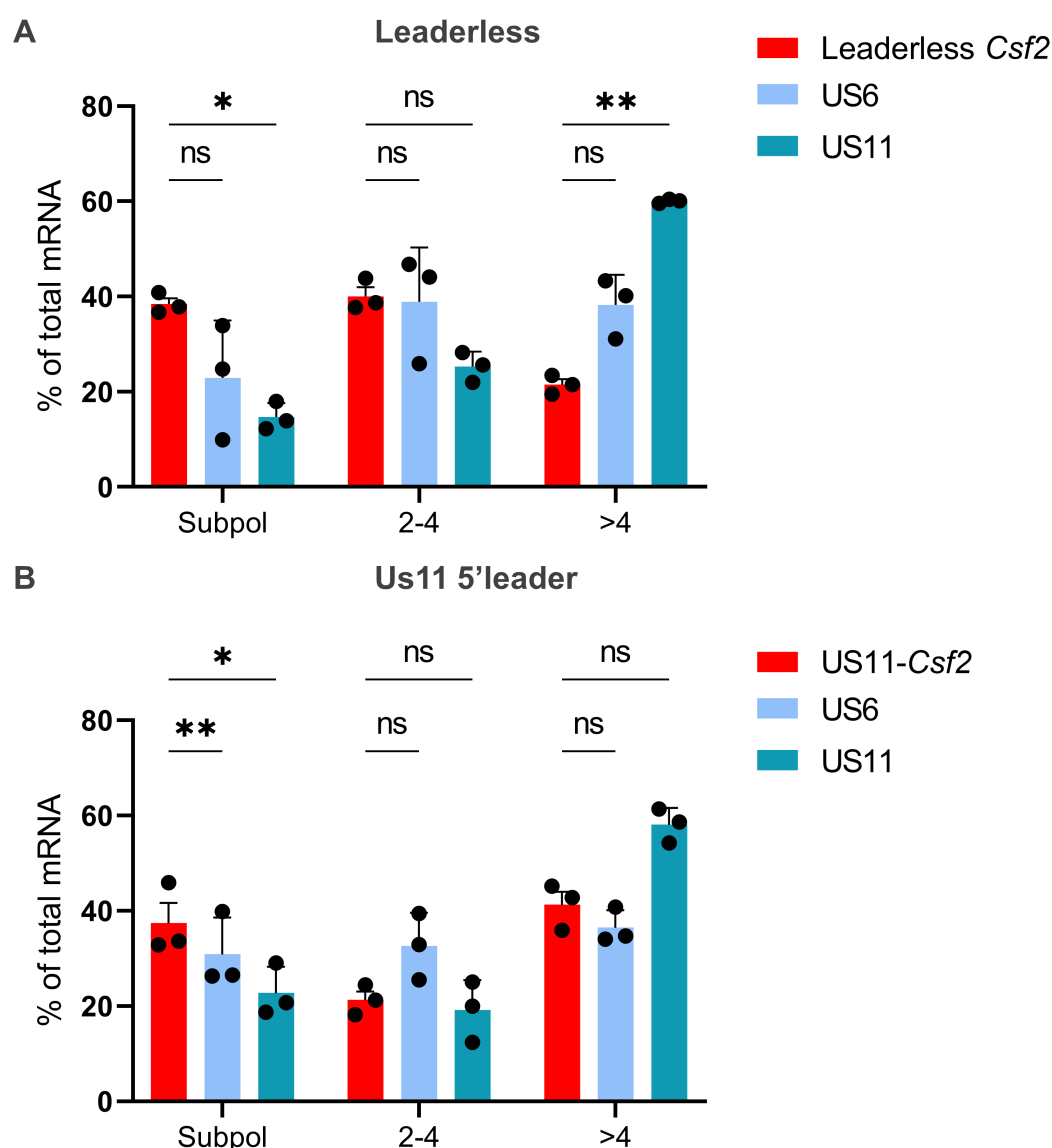

**Supplementary Figure 7. Leaderless transgene mRNAs are suboptimally translated compared to viral mRNA.** In the same polysome profiling experiment described in Figure 4, the mRNA distribution of US6 and US11 were compared to that of leaderless *Csf2* (A) or US11-*Csf2* (B) mRNA.
