# Supplementary figures and images for: Adaptation of transgene mRNA translation boosts the anticancer efficacy of oncolytic HSV1
Source: HighWire-hosted journal article supplement (doi:10.1136/jitc-2022-006408), 2023-03-01

Supplementary Figure 9.

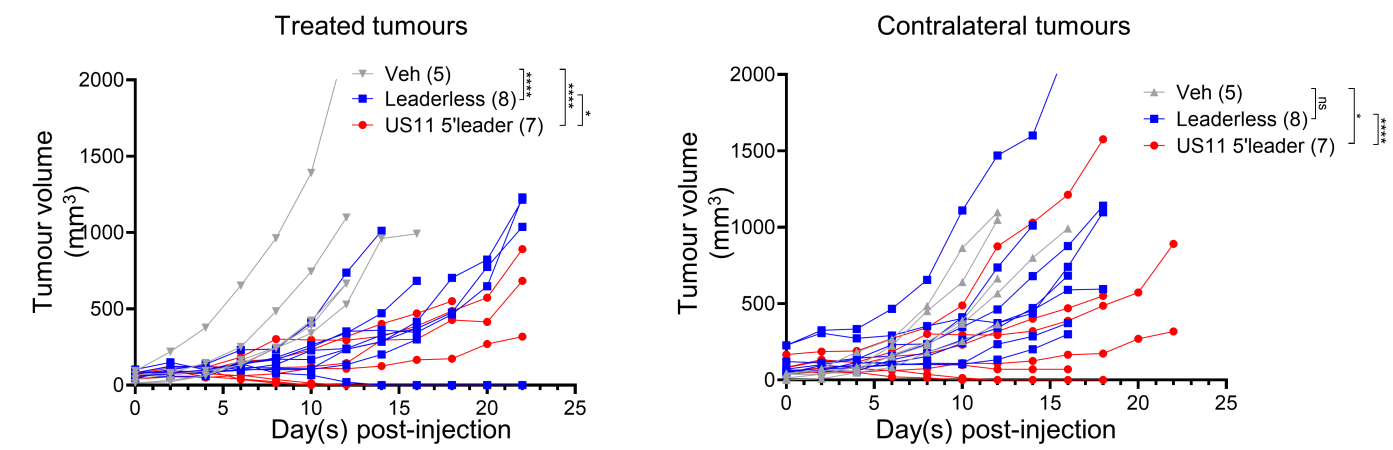

Supplementary Figure 9. Size of individual tumours in Figure 5E.

Supplement: jitc-2022-006408supp009_data_supplement.pdf [file jitc-2022-006408supp009_data_supplement.pdf]
